# Supplementary material for: Terpinen-4-ol, the Main Bioactive Component of Tea Tree Oil, as an Innovative Antimicrobial Agent against Legionella pneumophila
Source: MDPI journal article supplement (doi:10.3390/pathogens11060682), 2022-06-14
Supplement: s1 [file s1]

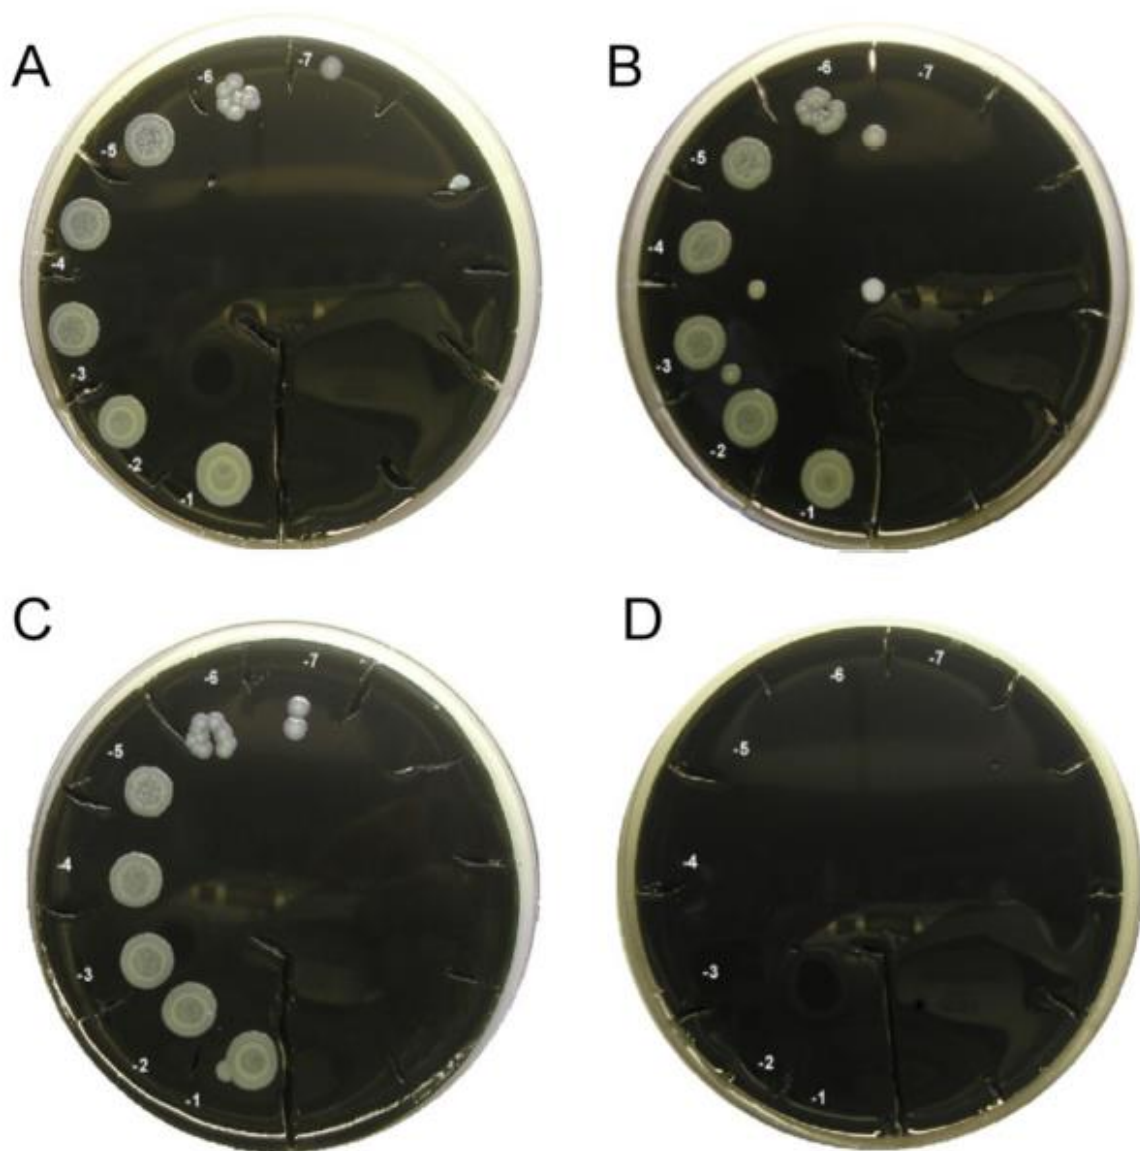

Figure S1. *Legionella pneumophila* sg1 ATCC 33152 growth in T-4-ol treated and untreated samples at different temperatures for SEM experiments. A: Untreated controls growth at T0; B, C: Untreated controls growth after one hour at 40° and 45° C; D: Lp treated with T-4-ol (0.42% v/v) or TTO (1%v/v) after one hour at 40° and 45° C (only a plate is represented)
